# Supplementary material for: A resource of large-scale molecular markers for monitoring Agropyron cristatum chromatin introgression in wheat background based on transcriptome sequences
Source: PubMed Central journal article supplement (PMC5607264; doi:10.1038/s41598-017-12219-4), 2017-09-20
Supplement: 41598_2017_12219_MOESM1_ESM.pdf [file 41598_2017_12219_MOESM1_ESM.pdf]

## Supplementary information

### **A resource of large-scale molecular markers for monitoring *Agropyron cristatum* chromatin introgression in wheat background based on transcriptome sequences**

Jinpeng Zhang<sup>1</sup>, Weihua Liu<sup>1</sup>, Yuqing Lu<sup>1</sup>, Qunxing Liu<sup>1</sup>, Xinming Yang<sup>1</sup>, Xiuquan Li<sup>1</sup>, Lihui Li<sup>1\*</sup>

Affiliation

<sup>1</sup>Institute of Crop Science, Chinese Academy of Agricultural Sciences, Beijing, 100081, China

\*Corresponding author: Email: [lilihui@caas.cn](mailto:lilihui@caas.cn), Fax: +86-10-62189650

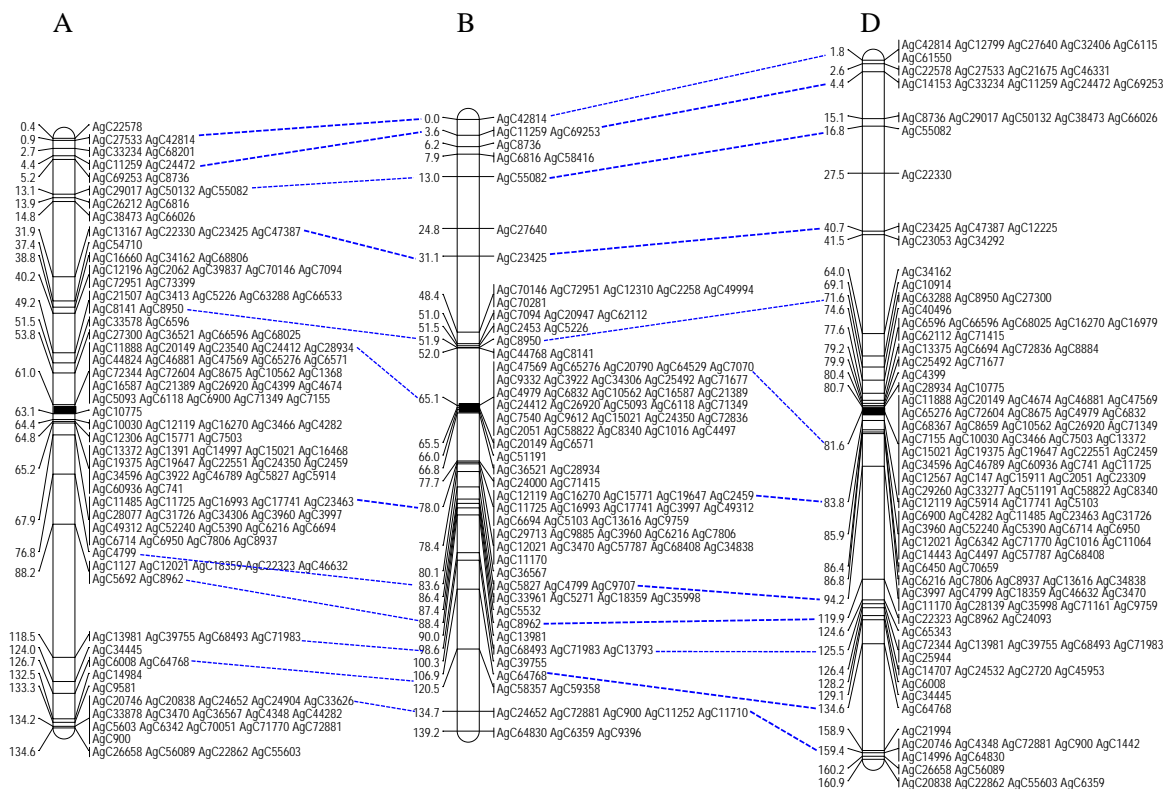

**Supplementary Figure 1.** A virtual chromosome location map was constructed by anchoring 680 *A. cristatum* 6P-specific EST-STS markers on 6A(A), 6B(B) and 6D(D) chromosomes of wheat POPSEQ genetic map.

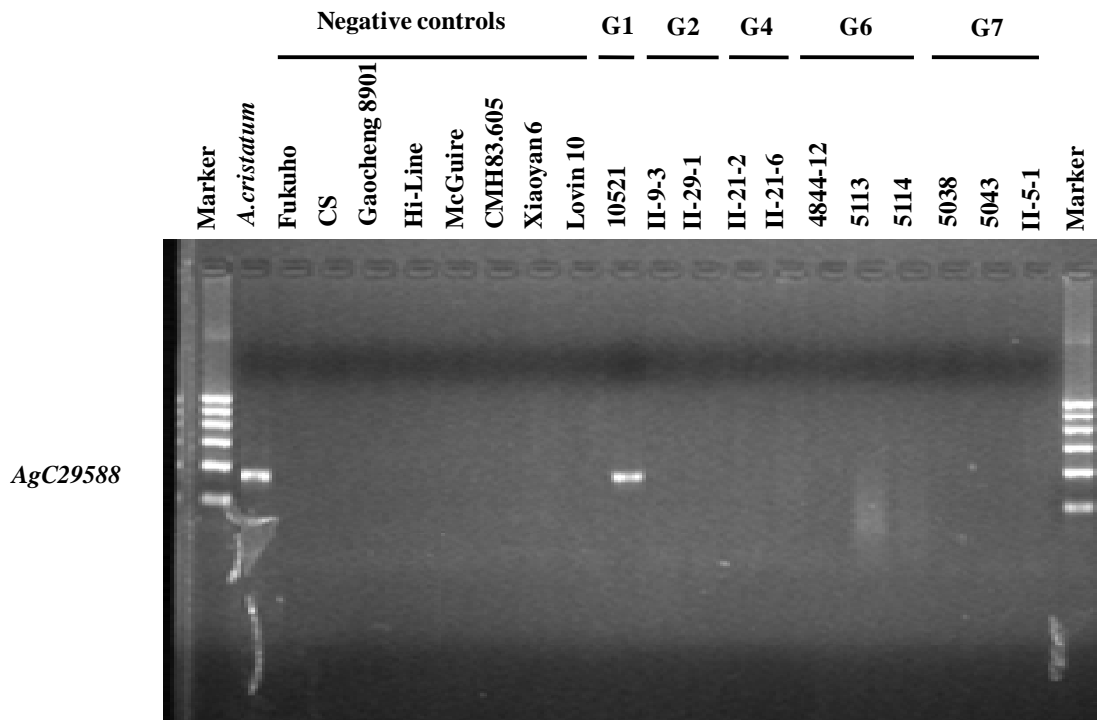

**Supplementary Figure 2.** The full-length gels of EST-STS markers AgC29588 specific for *A. cristatum* addition lines in wheat genetic backgrounds. The amplification product of EST-STS markers were run on 2% agarose gel. G1, G2, G4, G6, and G7 indicate the homologous groups of alien chromosomes of *A. cristatum*.

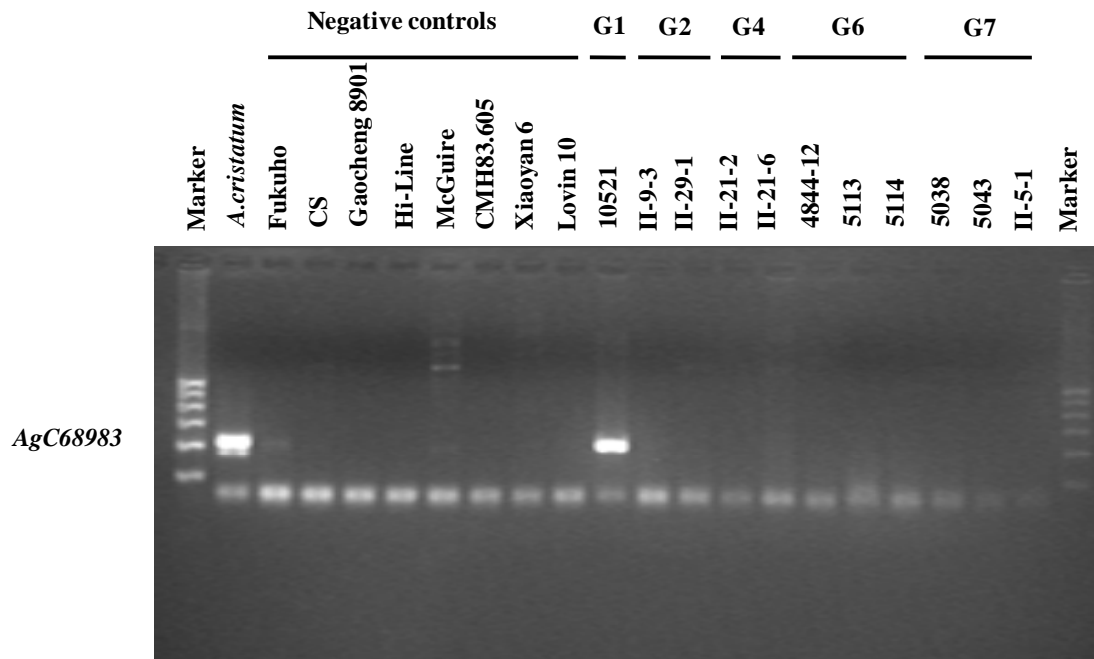

**Supplementary Figure 3.** The full-length gels of EST-STS markers *AgC68983* specific for *A. cristatum* addition lines in wheat genetic backgrounds. The amplification product of EST-STS markers were run on 2% agarose gel. G1, G2, G4, G6, and G7 indicate the homologous groups of alien chromosomes of *A. cristatum*.

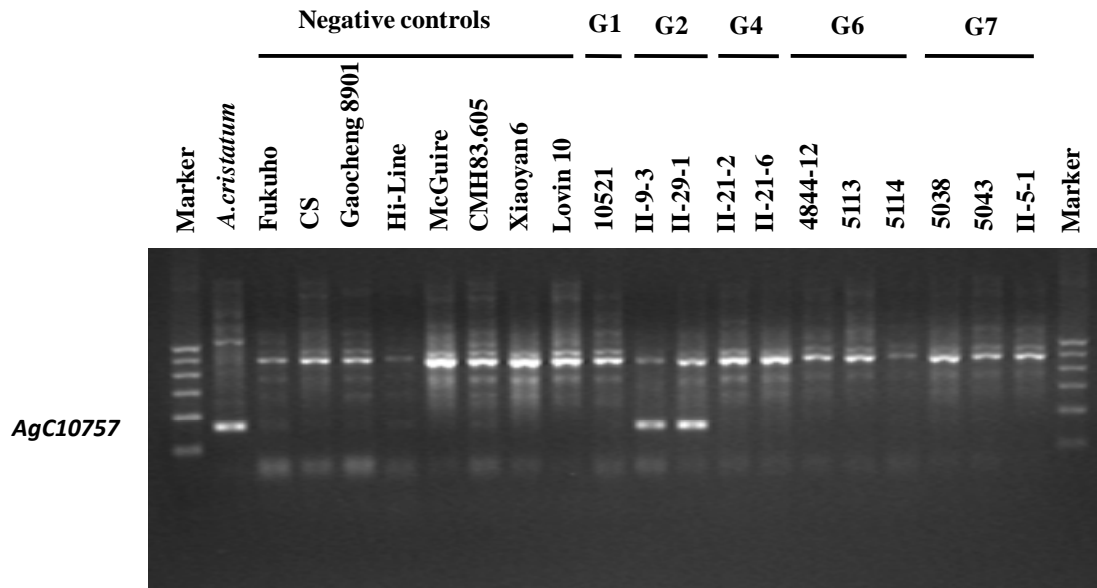

**Supplementary Figure 4.** The full-length gels of EST-STS markers AgC10757 specific for *A. cristatum* addition lines in wheat genetic backgrounds. The amplification product of EST-STS markers were run on 2% agarose gel. G1, G2, G4, G6, and G7 indicate the homologous groups of alien chromosomes of *A. cristatum*.

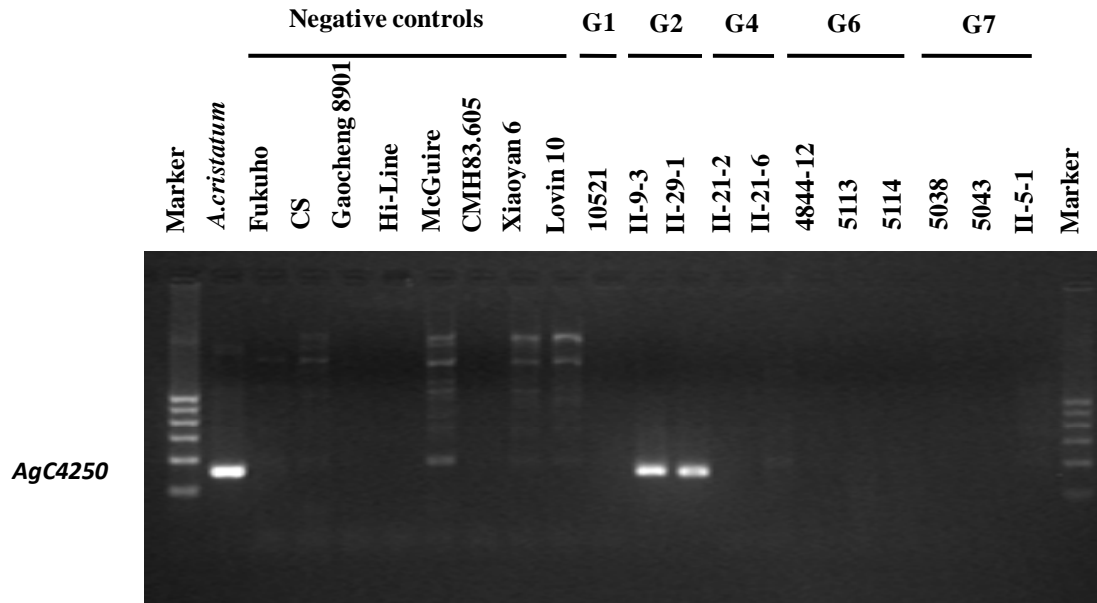

**Supplementary Figure 5.** The full-length gels of EST-STS markers AgC4250 specific for *A. cristatum* addition lines in wheat genetic backgrounds. The amplification product of EST-STS markers were run on 2% agarose gel. G1, G2, G4, G6, and G7 indicate the homologous groups of alien chromosomes of *A. cristatum*.

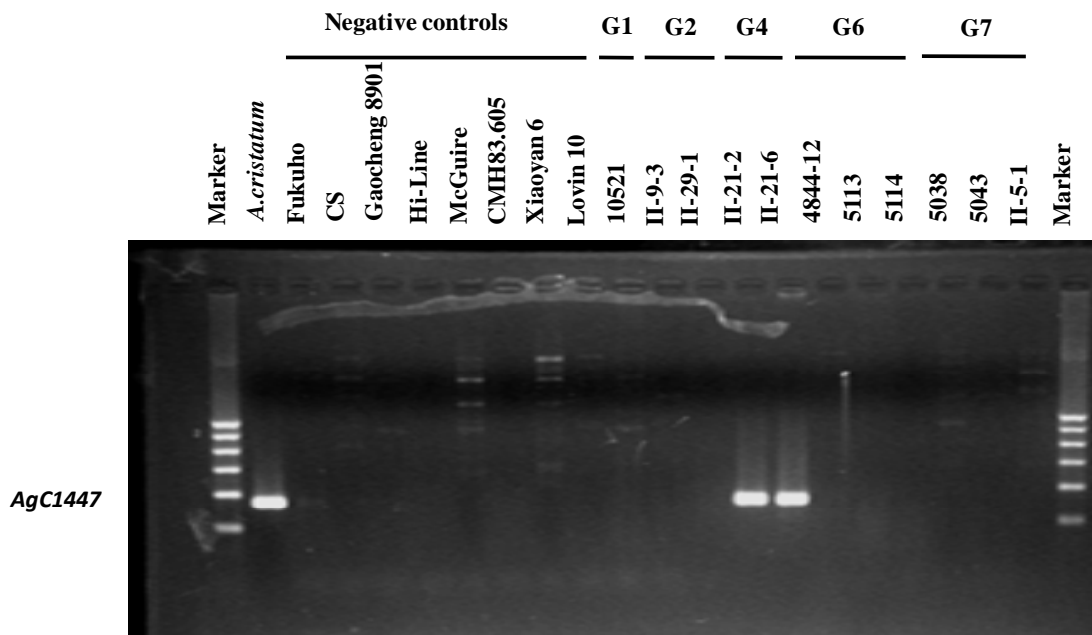

**Supplementary Figure 6.** The full-length gels of EST-STS markers AgC1447 specific for *A. cristatum* addition lines in wheat genetic backgrounds. The amplification product of EST-STS markers were run on 2% agarose gel. G1, G2, G4, G6, and G7 indicate the homologous groups of alien chromosomes of *A. cristatum*.

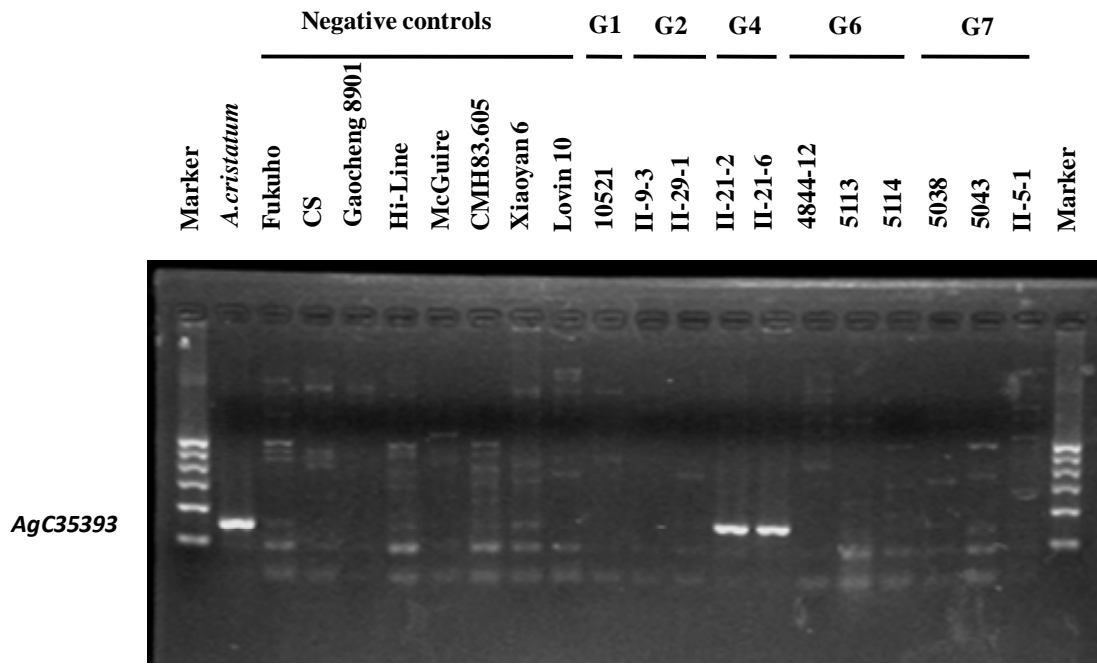

**Supplementary Figure 7.** The full-length gels of EST-STS markers AgC35393 specific for *A. cristatum* addition lines in wheat genetic backgrounds. The amplification product of EST-STS markers were run on 2% agarose gel. G1, G2, G4, G6, and G7 indicate the homologous groups of alien chromosomes of *A. cristatum*.



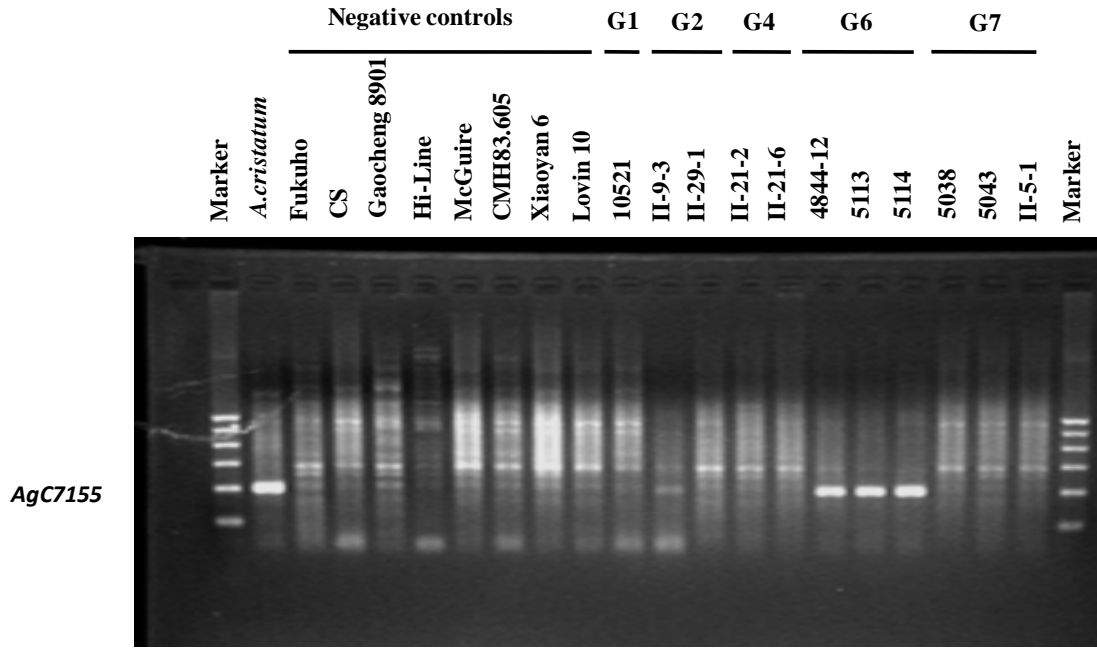

**Supplementary Figure 8.** The full-length gels of EST-STS markers AgC7155 specific for *A. cristatum* addition lines in wheat genetic backgrounds. The amplification product of EST-STS markers were run on 2% agarose gel. G1, G2, G4, G6, and G7 indicate the homologous groups of alien chromosomes of *A. cristatum*.

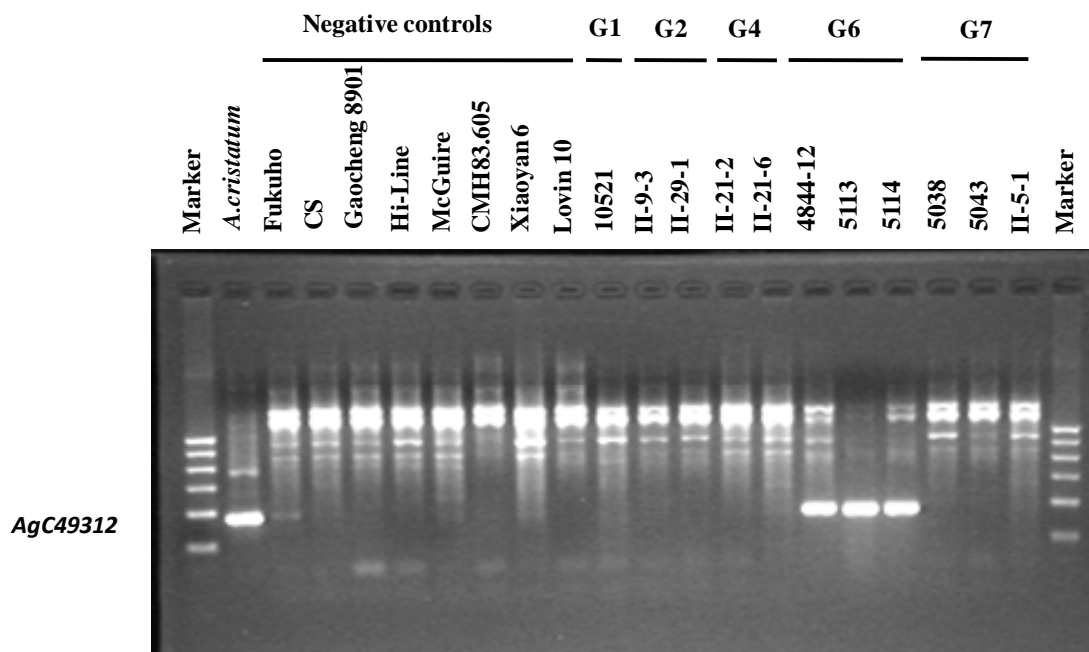

**Supplementary Figure 9.** The full-length gels of EST-STS markers AgC49312 specific for *A. cristatum* addition lines in wheat genetic backgrounds. The amplification product of EST-STS markers were run on 2% agarose gel. G1, G2, G4, G6, and G7 indicate the homologous groups of alien chromosomes of *A. cristatum*.

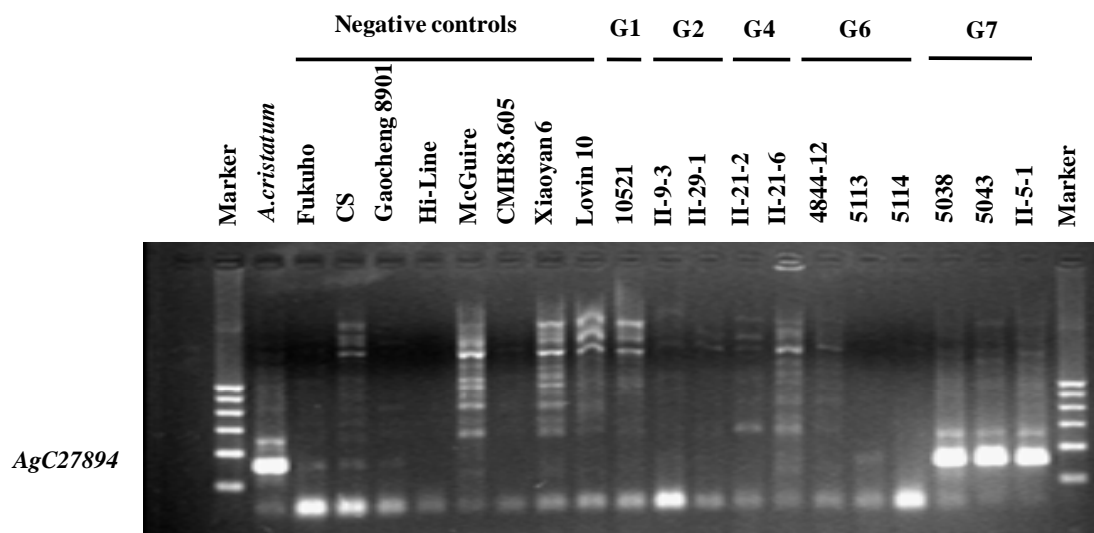

**Supplementary Figure 10.** The full-length gels of EST-STS markers *AgC27894* specific for *A. cristatum* addition lines in wheat genetic backgrounds. The amplification product of EST-STS markers were run on 2% agarose gel. G1, G2, G4, G6, and G7 indicate the homologous groups of alien chromosomes of *A. cristatum*.

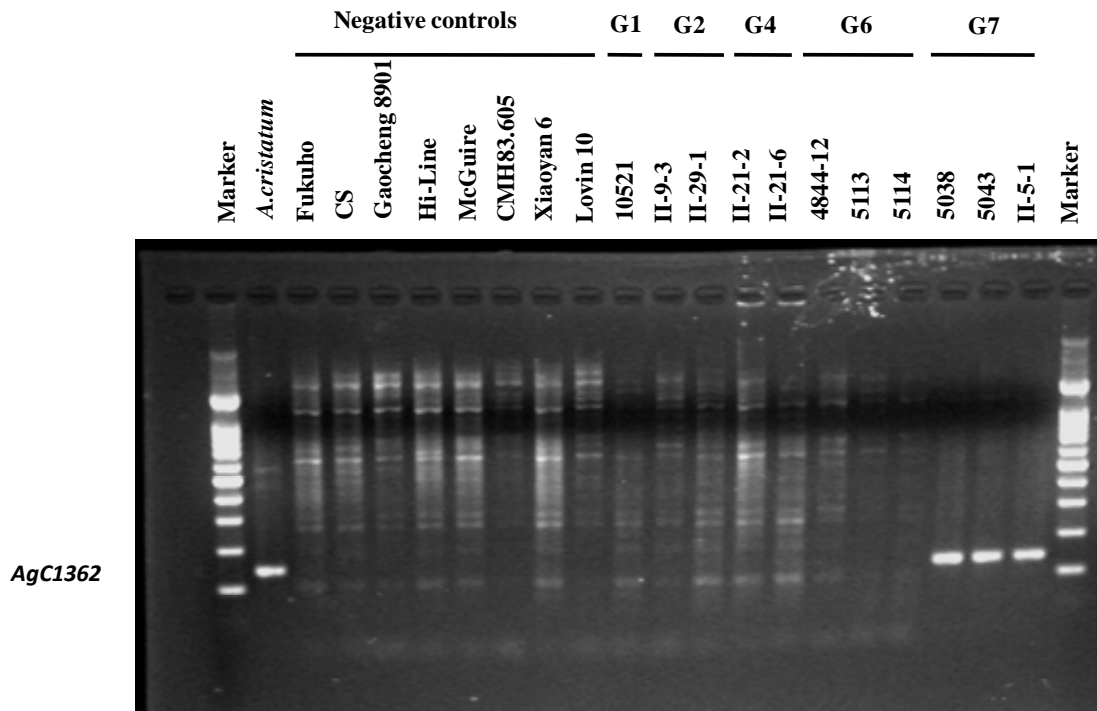

**Supplementary Figure 11.** The full-length gels of EST-STS markers AgC1362 specific for *A. cristatum* addition lines in wheat genetic backgrounds. The amplification product of EST-STS markers were run on 2% agarose gel. G1, G2, G4, G6, and G7 indicate the homologous groups of alien chromosomes of *A. cristatum*.
